# Supplementary material for: The Tip of the Four N-Terminal α-Helices of Clostridium sordellii Lethal Toxin Contains the Interaction Site with Membrane Phosphatidylserine Facilitating Small GTPases Glucosylation
Source: PubMed Central journal article supplement (PMC4848617; doi:10.3390/toxins8040090), 2016-03-25
Supplement: toxins-08-00090-s001.pdf [file toxins-08-00090-s001.pdf]

# Supplementary Materials: The Tip of the Four *N*-Terminal $\alpha$ -Helices of *Clostridium sordellii* Lethal Toxin Contains the Interaction Site with Membrane Phosphatidylserine Facilitating Small GTPases Glucosylation

Carolina Varela Chavez, Georges Michel Haustant, Bruno Baron, Patrick England, Alexandre Chenal, Serge Pauillac, Arnaud Blondel, Michel-Robert Popoff

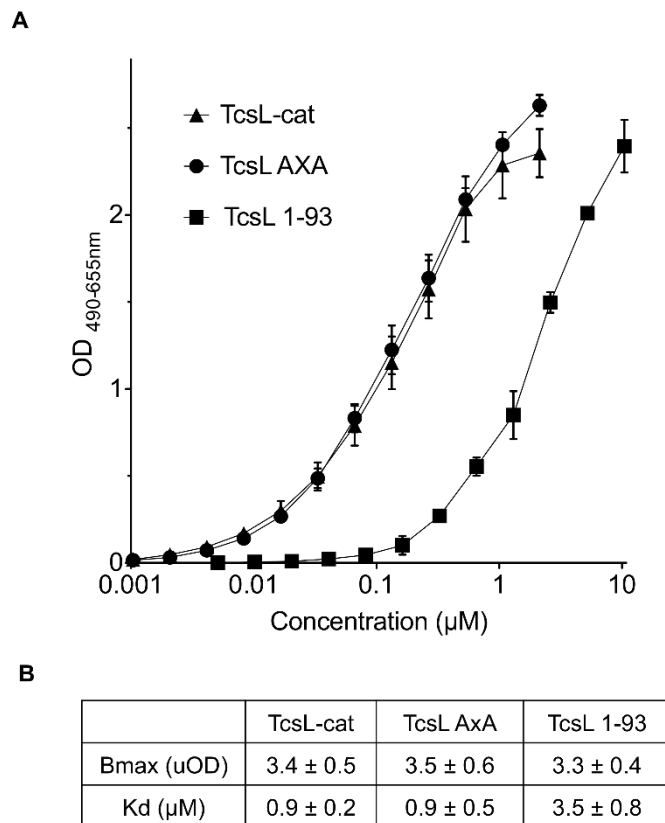

**Figure S1.** Binding of TcsL-cat, TcsL-cat-AXA and TcsL 1–93 to BPS as monitored by ELISA analysis. (A) Interaction of the TcsL-cat and TcsL 1–93 with BPS. The values represent the means  $\pm$  SEM of three independent experiments; (B) Affinity constants of TcsL-cat, TcsL-cat-AXA, and TcsL 1–93 binding to PS as determined by ELISA. The values represent the means  $\pm$  SEM of three independent experiments.

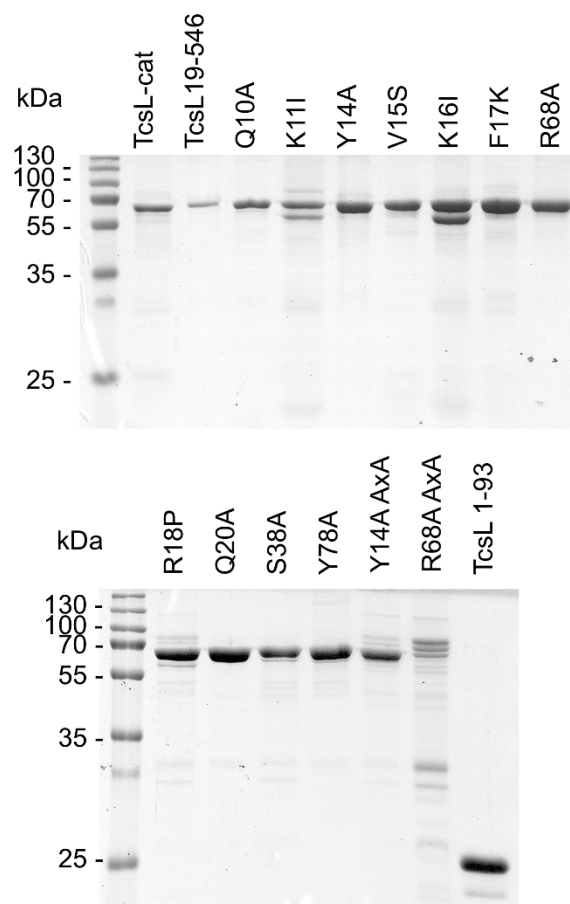

**Figure S2.** SDS-PAGE of recombinant TcsL-cat and mutants. Recombinant TcsL-cat and mutants (1–5  $\mu$ g) have been run on a SDS-10%PAGE gel and stained with Coomassie blue.
